# Supplementary material for: Route efficiency assessment and review of the synthesis of β-nucleosides via N -glycosylation of nucleobases
Source: Royal Society of Chemistry journal article supplement (doi:10.1039/d0gc02665d), 2020-11-19
Supplement: d0gc02665d1.xlsx [file d0gc02665d1.xlsx]

## Sheet: Nucleosides
Nucleosides
Reaction	Compound	Time [h]	Total Time [h]	Total Reaction Solvent [mL/g]	sEF [kg/kg]	cEF [kg/kg]	cEF contributions [kg/kg]				Type	Glcosylation Yield [%]	Total Yield [%]	Total Steps	Chromato-graphy Steps	Sugar Synthon	Reference
							Reagents	Inorganics	Solvents	Water
N1	5-methyluridine	17.25	47.5	106.294	40.3663	31979.6	53.0792	1137.28	29916.5	890.495	Anhydroses	39	24.18	2	2	S4	Downey 2015
N2	5-bromouridine	17.25	47.5	118.395	46.1444	35889.1	60.2889	1276.28	33572.9	999.333		28	17.36	2	2	S4	Downey 2015
N3	5-trifluorouridine	17.25	47.5	110.377	42.7423	33299	55.8351	1184.18	31150.2	927.216		31	19.22	2	2	S4	Downey 2015
N4	uridine	17.25	47.5	138.863	53.7632	42499.3	70.3289	1511.38	39757.4	1183.42		31	19.22	2	2	S4	Downey 2015
N5	2,6-dichloropurine riboside	36.5	66.75	120.849	29.4085	21030.9	37.0213	686.766	19498.1	1003.11		28	17.36	2	2	S4	Downey 2015
N6	adenosine	19	49.25	113.275	24.2317	20194.5	30.8095	652.683	19072.8	447.048		40	24.8	2	2	S4	Downey 2015
N7	2-amino-6-chloropurine riboside	89	119.25	48.5266	11.0211	9605.3	14.6645	310.546	9064.95	219.921		74	45.88	2	2	S4	Downey 2015
N8	uridine	30.16	39.08	141.421	5.70588	4096.47	7.23529	121.353	3985.24	16.4706		28	14.56	2	1	S5	Downey 2017
N9	cytidine	30.16	39.08	108.842	3.42081	2667.75	4.82805	78.5973	2583.19	12.6697		36	18.72	2	1	S5	Downey 2017
N10	5-fluorouridine	30.16	39.08	114.531	4.78095	3562.82	6.20952	105.286	3450.09	13.3333		31	16.12	2	1	S5	Downey 2017
N11	6-chloropurine riboside	30.16	39.08	59.0685	1.79657	1760.08	3.01716	50.6127	1696.3	16.8627		56	29.12	2	1	S5	Downey 2017
N12	adenosine	30.16	39.08	109.336	3.85909	3050.87	5.26818	87.3182	2950.6	12.7273		33	17.16	2	1	S5	Downey 2017
N13	guanosine	50.66	59.58	226.66	9.64151	6016.93	11.4906	230.094	5276.63	521.698		15	7.8	2	2	S5	Downey 2017
N14	5-methyluridine	23.58	65.91	1382.72	8.87966	8932.82	13.1728	252.241	7302.26	1368.45	Glycosyl Phosphates	75	63	2	1	S6	Alexeev 2020
N15	5-fluorouridine	23.58	65.91	662.221	8.01164	4661.22	11.987	119.918	3881.83	650.574		76	63.84	2	1	S6	Alexeev 2020
N16	5-bromouridine	23.58	65.91	1145.82	6.37886	7296.46	9.75029	209	5946.51	1133.86		84	70.56	2	1	S6	Alexeev 2020
N17	2-chloroadenosine	27.42	27.42	108.696	3.45261	3045.05	4.45261	86.087	2812.18	143.33		81	81	1	1	-	Barai 2002
N18	2'-deoxy-5-fluorouridine	24.25	48	1026.21	24.6113	6224.63	28.6887	449.163	4758.97	994.963		81	52.65	2	2	S7	Drenichev 2018
N19	2'-deoxy-5-ethyluridine	24.25	48	987.536	23.6731	5984.58	27.6318	431.84	4575.43	956.59		81	52.65	2	2	S7	Drenichev 2018
N20	2'-deoxyuridine	24.25	48	1120.53	26.9227	6810.02	31.2895	491.404	5206.53	1088.53		80	52	2	2	S7	Drenichev 2018
N21	2-chloro-2'-deoxyadenosine	147.75	171.5	6001.65	24.4928	18206.2	28.5328	229.28	12002.7	5952.72		70	45.5	2	2	S7	Drenichev 2018
N22	2'-deoxyadenosine	24.25	48	883.3	20.9836	5337.47	24.6224	385.155	4080.79	853.174		93	60.45	2	2	S7	Drenichev 2018
N23	2'-deoxyguanosine	24.25	48	858.671	20.3588	5184.58	23.922	374.124	3963.92	828.74		95	61.75	2	2	S7	Drenichev 2018
N24	2,6-dichloropurine riboside	26.5	26.5	1470.59	8.70588	6204.85	9.70588	-	479.235	5716.91		49	49	1	1	-	Yehia 2020
N25	2,6-dichloropurine 2-deoxyriboside	26.5	26.5	1388.89	11	7223.5	12	-	702.647	6934.12		45	45	1	1	-	Yehia 2020
N26	6-chloro-2-fluoropurine riboside	26.5	26.5	1562.5	9.1875	6531.72	10.1875	-	503	6019.53		53	53	1	1	-	Yehia 2020
N27	6-chloro-2-fluoropurine 2-deoxyriboside	26.5	26.5	1562.5	11	7397.09	13.375	-	624.559	6722.5		54	54	1	1	-	Yehia 2020
N28	6-chloro-2-fluoropurine riboside	26	26	217.4	2.75217	3316.63	3.75217	193.761	2431.88	217.391		60	60	1	2	-	Zhou 2015
N29	2'-deoxyguanosine	5.5	5.5	173.3	11.817	200.241	12.817	2.67857	-	185.745		50	50	1	0	-	Zuffi 2004
N30	2'-deoxyinosine	44.5	44.5	207.5	2.76763	1583.68	3.76763	0.273859	156.494	1424.14		76	76	1	1	-	Ubiali 2004
N31	2'-deoxyguanosine	44.5	44.5	207.5	2.01954	164.883	3.01954	0.273859	-	162.648		92	92	1	0	-	Ubiali 2004
N32	uridine	33.5	80.09	157.637	24.66	13325.9	31.225	585.29	10683.8	2029.33	n-Pentenyl-Orthoesters	92	42.5776	7	4	S9	Fraser-Reid 2013
N33	5-methyluridine	33.5	80.09	135.219	22.2477	11934.7	28.2613	510.703	9460.38	1938.7		97	44.8916	7	4	S9	Fraser-Reid 2013
N34	cytidine	53.41	100	176.543	29.6944	13359	36.8778	563.422	10251	2511.58		82	37.9496	8	4	S9	Fraser-Reid 2013
N35	2,6-dichloropurine riboside	33.5	80.09	121.775	20.5	10590.3	26.0992	476.099	8343.86	1747.39		85	39.338	7	4	S9	Fraser-Reid 2013
N36	2-amino-6-chloropurine riboside	33.5	80.09	136.245	26.3457	14494.9	33.266	610.298	11872.5	1982.59		70	32.396	7	4	S9	Fraser-Reid 2013
N37	adenosine	33.5	80.09	227.043	68.3472	35596.1	84.8056	1582.44	30414.5	3522.78		30	13.884	7	4	S9	Fraser-Reid 2013
N38	uridine	64.67	233.24	156.353	34.6308	9650.95	45.8615	374.923	7736.55	1506.31	Trifluoro-acet-imidates	98	32.2714	9	4	S12	Liao 2008
N39	5-methyluridine	64.67	233.24	160.199	37.55	10349.3	49.6333	408.5	8415.77	1489.1		88	28.9784	9	4	S12	Liao 2008
N40	uridine	64.67	233.24	154.124	36.3846	11762.3	42.9385	579.538	9911.32	1238.31		98	25.872	9	4	S10	Liao 2008
N41	5-methyluridine	64.67	233.24	157.97	39.4333	12271.8	46.45	630.167	10357.9	1250.1		88	23.496	9	4	S10	Liao 2008
N42	uridine	64.67	233.24	170.913	40.0357	10971.7	52.9107	432.679	8936.64	1564.04		88	28.9784	9	4	S12	Liao 2009
N43	5-methyluridine	64.67	233.24	151.99	33.5672	9411.43	44.4925	363.731	7521.37	1494.18		98	31.9088	9	4	S12	Liao 2009
N44	uridine	34	62	142.551	18.7333	7989.99	22.4364	316.327	6266.34	1388.63	Propar-gyl-Ortho-esters	85	41.6075	7	3	S13	Rao 2015
N45	5-methyluridine	34	62	135.27	17.9869	7780.08	21.5752	301.725	5996.68	1463.69		85	41.6075	7	3	S13	Rao 2015
N46	uridine	33.25	70.5	195.708	23.4358	10632.2	29.5978	436.648	8124.06	2047.56		93	37.2465	8	3	S14	Rao 2015
N47	5-methyluridine	33.25	70.5	189.247	21.7058	9942.05	27.4767	405.297	7556.45	1958.16		95	38.0475	8	3	S14	Rao 2015
N48	uridine	33.83	79.74	323.532	40.15	18433.3	44.8333	900	15405.8	2094.58	Thio-glyco-sides	81	24.5106	7	4	S15	Liu 2015
N49	5-methyluridine	33.83	79.74	298.853	37.2154	15108.9	41.6154	835.385	12309.5	1933.46		81	24.5106	7	4	S15	Liu 2015
N50	uridine	33.83	102.32	355.742	42.2	19149.4	51	1041.54	15525.2	2544.62		85	25.721	8	5	S16	Liu 2015
N51	cytidine	55.75	124.24	373.844	44.7067	17942.8	52.4667	932	14138.6	2831.13		99	29.9574	9	5	S16	Liu 2015
N52	2,6-dichloropurine riboside	27.42	95.91	205.651	25.63	11800.8	31.7	631.15	9232.6	1914.2		99	29.9574	7	5	S16	Liu 2015
N53	adenosine	83.17	84.84	111.894	28.2	13783.2	32.5	152.156	11795.2	1807.28	Lewis Acid TG	81	71.3691	4	2	S17	Azuma 1977
N54	adenosine	49.17	50.84	885.028	73.2711	29106.2	85.9556	284.378	23260.3	5487.26		39	38.61	4	1	S17	Miyaki 1970
N55	6-methylpurine riboside	33.17	49.84	286.783	7.27528	7581.25	13.1713	128.652	7435.76	6.99438		91	72.9729	5	3	S19	Boryski 1998
N56	uridine	99.67	151.91	201.213	31.1167	11504.8	37.1696	548.167	9273	1652.03	o-hex-ynylbenzoates	89	25.3472	7	5	S20	Zhang 2011
N57	5-methyluridine	99.67	151.91	197.439	28.2807	10566.8	33.8753	499.989	8470.42	1567.74		96	27.3408	7	5	S20	Zhang 2011
N58	adenosine	134.5	288.57	282.74	53.4706	17680.3	68.1471	723.794	14259.5	2643.47		77	27.412	11	6	S21	Zhang 2011
N59	2-amino-6-chloropurine riboside	134.5	288.57	235.216	42.3256	14102.3	54.1395	569.977	11206.4	2283.6		85	30.26	11	6	S21	Zhang 2011
N60	6-(trifluoromethyl)purine 2-deoxyriboside	31.58	53.16	292.719	14.926	6489.37	21.6712	333.021	5422.32	718.151	Halogenoses	81	14.5638	5	2	S22	Hockova 1999
N61	2-thiothymidine	16.5	38.08	344.453	35.0187	7255.03	40.5627	197.868	6195.89	825.495		40	23.2	6	1	S22	Ackermann 2013
N62	thymidine	33.33	54.91	244.532	12.4072	3152.05	16.4451	134.654	823.15	2181.34		71	36.6502	6	1	S22	Freskos 1989
N63	2'-deoxy-5-fluorouridine	33.33	54.91	285.416	15.4289	3313.92	20.2184	167.963	863.295	2266.6		56	28.9072	6	1	S22	Freskos 1989
N64	2,6-dichloropurine 2-deoxyriboside	45.42	67	121.767	8.30961	3965.97	12.231	124.906	2131.62	1700.66		59	30.4558	5	2	S22	Kazimierczuk 1984
N65	6-chloropurine 2-deoxyriboside	45.42	67	133.637	9.43179	4356.84	13.8073	138.397	2336.82	1871.62		59	30.4558	5	2	S22	Kazimierczuk 1984
N66	6-chloropurine riboside	29.42	70.75	246.672	17.8793	8375.38	19.981	276.748	6672.7	1408.33	Glycosyl acetates	91	34.8257	5	3	S1	Moreau 2013
N67	2-amino-6-chloropurine riboside	119.67	261.83	289.72	36.3662	3768.78	39.6426	94.451	1958.67	1679.08		91	46.1643	6	2	S3	Kim 2001
N68	uridine	27.55	68.88	155.267	19.8764	6135.35	22.3599	242.019	4323.24	1550.59		79	30.2333	5	3	S1	Parmenopoulou 2012
N69	5-fluorouridine	29.5	171.66	132.535	24.8329	4135.33	28.4729	285.812	1220.84	2603.6		91	46.1643	6	1	S3	Shirouzou 2014
N70	5-iodouridine	29.5	171.66	132.535	17.246	3018.57	20.0615	196.553	835.617	1968.99		94	47.6862	6	1	S3	Shirouzou 2014
N71	5-trifluorouridine	28.75	70.08	90.5059	22.2275	11814	24.1875	346.65	10139.4	1305.96		96	36.7392	5	3	S1	Shirouzou 2014
N72	5-ethyluridine	81.08	223.24	216.33	18.5282	2417.86	21.9175	13.4101	594.924	1790.78		95	48.1935	7	1	S3	Niedballa 1970
N73	uridine	38.5	129.75	248.527	59.5	24616.3	71.6	1278.5	20887.7	2405.4	EPP Glyco-sides	90	24.03	9	6	S25	Hu 2019
N74	cytidine	60.42	151.67	284.527	65.4	24732.4	77.5	1278.5	20937.4	2515.6		91	24.297	10	6	S25	Hu 2019
N75	adenosine	131.08	222.33	437.518	71.2222	29598.3	87.2222	1586.89	24475.6	3484.67		74	22.2	10	7	S25	Hu 2019
N76	uridine	31.08	185.15	248.617	42.0833	13678.2	54.4167	580	11207.7	1847.17	o-(1-Phenylviyl)benzoates	93	38.13	8	6	S26	Li 2020
N77	5-methyluridine	31.08	185.15	244.451	42.0833	13510.3	54.4167	580	11188.6	1698.33		85	34.85	8	6	S26	Li 2020
N78	5-fluorouridine	31.08	185.15	214.689	36.1429	12178.8	46.8571	497.143	9651.79	1992.57		96	39.36	8	6	S26	Li 2020
N79	cytidine	53	207.07	264.963	44.1538	13333.2	55.6154	553.846	10317.2	2416.77		96	39.36	9	6	S26	Li 2020
N80	adenosine	131.08	285.15	396.117	46.8	15895.9	61.4	661.7	12074.4	3111.4		84	34.44	9	7	S26	Li 2020

## Sheet: Sugar Synthons
Sugar Synthons
Reaction	Compound	Time [h]	Total Time [h]	Total Reaction Solvent [mL/g]	sEF [kg/kg]	cEF [kg/kg]	cEF contributions [kg/kg]				Total Steps	Chromato-graphy Steps	Total Yield [%]	Reference
							Reagents	Inorganics	Solvents	Water
S1	1,2,3,5-tetra-O-acetyl-b-D-ribose	41.33	41.33	36.52	7.23242	967.208	8.23242	62.1518	759.911	137.923	3	1	43	Andreeva 2019
S2	2,3,5-tri-O-acetyl-D-ribose	4.16	45.49	34.2378	12.2516	2428.05	14.4027	147.041	2070.47	198.57	4	2	34.4	Nudelman 1987
S3	1-O-acetyl-2,3,5-tri-O-benzoyl-D-ribose	142.16	142.16	32.52	5.88928	173.99	6.88928	0.956825	83.8888	83.2549	4	0	57	Kissman 1955
S4	5-O-monomethoxytrityl-D-ribose	30.25	30.25	8.62	2.61207	2157.55	3.61207	88.8218	1962.52	103.592	1	1	62	Downey 2015
S5	5-O-trityl-D-ribose	8.92	8.92	2.45	1.12359	34.8509	2.12359	0.264836	28.0677	5.3948	1	0	52	Downey 2017
S6	7-methylguanosine hydroiodide	42.33	42.33	17.86	1.68393	292.577	2.68393	-	290.893	-	1	0	84	Alexeev 2020
S7	2'-deoxy-7-methylguanosine hydroiodide	23.75	23.75	21.74	6.98913	249.489	7.98913	-	242.5	-	1	0	65	Drenichev 2018
S8	2,3,5-Tri-O-benzoyl-1-O-methyl-D-ribose	23.42	23.42	24.78	1.24948	953.026	2.24948	51.4869	853.773	45.5169	2	1	73	Ramamurty 2011
S9	3,5-Di-O-benzoyl-a-D-ribofuranose-1,2-(pent-4-enyl orthobenzoate)	23.17	46.59	149.216	4.90557	2398.07	6.91823	126.205	1965.25	300.697	4	2	51.83	Ramamurty 2011
S10	2,3,5-Tri-O-acetyl-D-ribofuranosyl 1-(N-phenyl)-2,2,2-trifluoroacetimidate	21.25	66.74	41.9541	10.1206	2670.43	12.3161	152.794	2367.78	139.942	5	3	29.928	Thomas 2007
S11	2,3,5-Tri-O-benzoyl-D-ribose	5.16	147.32	30.8318	9.96686	1168.25	12.5677	49.0634	988.28	120.793	5	1	42.75	Nudelman 1987
S12	2,3,5-Tri-O-benzoyl-D-ribofuranosyl 1-(N-phenyl)-2,2,2-trifluoroacetimidate	21.25	168.57	53.6843	9.49024	1818.37	13.008	83.0758	1624.26	101.551	6	2	37.1925	Thomas 2007
S13	3,5-di-O-benzoyl-α-D-ribofuranoside (prop-2-yn-1-yl)-1,2-orthobenzoate	28	28	17.27	3.98781	1168.18	4.98781	58.8115	1036.93	68.4563	4	1	55	Thadke 2014
S14	3,5-di-O-benzyl-α-D-ribofuranoside (prop-2-yn-1-yl)-1,2-orthobenzoate	9.25	37.25	104.438	6.7938	2396.05	9.08579	127.152	2115.81	146.295	6	2	45.1	Thadke 2014
S15	p-tolyl-2,3,5-tri-O-acetyl-1-thio-D-ribose	4.58	45.91	103.8	10.2792	2532.34	12.1125	151.743	2209.23	164.036	4	2	34.4	Kurosu 2008
S16	p-tolyl-2,3,5-tri-O-benzoyl-1-thio-D-ribose	22.58	68.49	144.855	9.37853	3237.55	11.5258	188.112	2876.19	166.099	5	3	34.056	Kurosu 2008
S17	4-N-2’,3’,5’-Tri-O-tetraacetylcytidine	1.67	1.67	12	3.92	15.68	4.92	-	11.76	-	1	0	99	Nowak 2005
S18	3’-5’-O-(tetraisopropyldisiloxan-1,3-diyl)-inosine	6.5	6.5	0	0.54688	1158.56	1.54688	21.632	1133.18	3.2	1	1	81	Kawase 1989
S19	2'-O-acetyl-3’-5’-O-(tetraisopropyldisiloxan-1,3-diyl)-inosine	10.17	16.67	14.4092	0.936599	1132.85	3.31988	20.2882	1108.4	2.76657	2	1	81	Boryski 1998
S20	2,3,5-tri-O-acetyl-D-ribofuranosyl ortho-hexynylbenzoate	6.75	52.24	154.282	9.76853	2679.26	11.8735	155.193	2374.19	140.31	5	3	31.992	Zhang 2011
S21	2,3,5-tri-O-benzoyl-D-ribofuranosyl ortho-hexynylbenzoate	6.75	154.07	230.22	8.95947	1789.81	12.2664	79.8269	1600.23	100.792	6	2	39.7575	Zhang 2011
S22	1-Chloro-2-deoxy-3,5-di-O-p-toluoyl-ribose	21.58	21.58	18	1.75363	234.074	2.75363	18.8906	63.2556	150.174	3	0	58	Rolland 1997
S23	3,5-Dimethyl-4-(2’-iodophenyl)phenyl 2,3,5-tri-O-acetyl-β-D-ribofuranoside	23.42	64.75	31.1637	8.58333	1866.9	10.3643	111.619	1612.18	134.714	4	2	36.12	Hu 2019
S24	3,5-Dimethyl-4-(2’-iodophenyl)phenyl 2,3,5-tri-O-benzoyl-β-D-ribofuranoside	12.58	77.33	53.0872	8.34808	2439.32	10.4788	140.988	2163.34	127.129	6	3	33.2304	Hu 2019
S25	3,5-Dimethyl-4-(2’-phenylethylphenyl)phenyl 2,3,5-tri-O-benzoyl-β-D-ribofuranoside	13.92	91.25	68.2829	10.9872	3926.35	13.9289	245.039	3472.31	201.784	7	4	30.2397	Hu 2019
S26	2,3,5-Tri-O-benzoyl-D-ribofuranosyl 2-(1-phenylvinyl) benzoate	6.75	154.07	27.9294	8.60714	1865.6	11.7607	94.6625	1611.11	151.216	6	2	41.04	Li 2020
